# Supplementary material for: Circulating microRNAs Suggest Networks Associated with Biological Functions in Aggressive Refractory Type 2 Celiac Disease
Source: MDPI journal article supplement (doi:10.3390/biomedicines10061408), 2022-06-14
Supplement: s1 [file s1]

**Table S2.** Dysregulated miRNAs in serum samples obtained from unresponsive subjects and subjects responsive to a gluten-free diet.

| MiRNA name                     | Fold change,<br>unresponsive vs. responsive | FDR adjusted <i>p</i> value |
|--------------------------------|---------------------------------------------|-----------------------------|
| hsa-miR-27b-3p                 | 6.73                                        | 0.00                        |
| hsa-miR-206                    | 3.29                                        | 0.04                        |
| hsa-miR-216b-5p                | 2.62                                        | 0.03                        |
| hsa-miR-4536-5p                | 1.98                                        | 0.03                        |
| hsa-miR-548g-3p                | 1.82                                        | 0.04                        |
| hsa-miR-1245a                  | -1.23                                       | 0.02                        |
| hsa-miR-1269b                  | -1.23                                       | 0.02                        |
| hsa-miR-519c-3p                | -1.23                                       | 0.02                        |
| hsa-miR-10a-5p                 | -1.24                                       | 0.04                        |
| hsa-miR-18b-5p                 | -1.24                                       | 0.04                        |
| hsa-miR-3130-3p                | -1.24                                       | 0.04                        |
| hsa-miR-323a-5p                | -1.24                                       | 0.04                        |
| hsa-miR-500a-5p+hsa-miR-501-5p | -1.24                                       | 0.04                        |
| hsa-miR-502-3p                 | -1.24                                       | 0.04                        |
| hsa-miR-514a-5p                | -1.24                                       | 0.04                        |
| hsa-miR-127-5p                 | -1.25                                       | 0.02                        |
| hsa-miR-134-3p                 | -1.25                                       | 0.02                        |
| hsa-miR-144-3p                 | -1.25                                       | 0.02                        |
| hsa-miR-15a-5p                 | -1.25                                       | 0.02                        |
| hsa-miR-18a-5p                 | -1.25                                       | 0.02                        |
| hsa-miR-1908-3p                | -1.25                                       | 0.02                        |
| hsa-miR-204-5p                 | -1.25                                       | 0.02                        |
| hsa-miR-219a-1-3p              | -1.25                                       | 0.02                        |
| hsa-miR-299-3p                 | -1.25                                       | 0.02                        |
| hsa-miR-300                    | -1.25                                       | 0.02                        |
| hsa-miR-30a-3p                 | -1.25                                       | 0.02                        |
| hsa-miR-323b-5p                | -1.25                                       | 0.02                        |
| hsa-miR-331-5p                 | -1.25                                       | 0.02                        |
| hsa-miR-378c                   | -1.25                                       | 0.02                        |
| hsa-miR-3918                   | -1.25                                       | 0.02                        |
| hsa-miR-422a                   | -1.25                                       | 0.02                        |
| hsa-miR-539-5p                 | -1.25                                       | 0.02                        |
| hsa-miR-553                    | -1.25                                       | 0.02                        |
| hsa-miR-663a                   | -1.25                                       | 0.02                        |
| hsa-let-7e-5p                  | -1.26                                       | 0.02                        |
| hsa-let-7g-5p                  | -1.26                                       | 0.02                        |
| hsa-miR-153-3p                 | -1.26                                       | 0.02                        |
| hsa-miR-205-5p                 | -1.26                                       | 0.02                        |
| hsa-miR-210-3p                 | -1.26                                       | 0.02                        |
| hsa-miR-5010-5p                | -1.26                                       | 0.03                        |
| hsa-miR-512-3p                 | -1.26                                       | 0.03                        |
| hsa-miR-519e-3p                | -1.26                                       | 0.03                        |
| hsa-miR-1250-5p                | -1.27                                       | 0.02                        |
| hsa-miR-433-3p                 | -1.28                                       | 0.01                        |
| hsa-miR-572                    | -1.29                                       | 0.02                        |
| hsa-let-7f-5p                  | -1.29                                       | 0.02                        |
| hsa-miR-1-3p                   | -1.29                                       | 0.02                        |
| hsa-miR-106a-5p+hsa-miR-17-5p  | -1.29                                       | 0.02                        |
| hsa-miR-1185-1-3p              | -1.29                                       | 0.02                        |

|                                 |       |      |
|---------------------------------|-------|------|
| hsa-miR-1204                    | -1.29 | 0.02 |
| hsa-miR-1224-3p                 | -1.29 | 0.02 |
| hsa-miR-1224-5p                 | -1.29 | 0.02 |
| hsa-miR-1233-3p                 | -1.29 | 0.02 |
| hsa-miR-1247-5p                 | -1.29 | 0.02 |
| hsa-miR-125a-5p                 | -1.29 | 0.02 |
| hsa-miR-128-2-5p                | -1.29 | 0.02 |
| hsa-miR-1281                    | -1.29 | 0.02 |
| hsa-miR-1285-3p                 | -1.29 | 0.02 |
| hsa-miR-1288-3p                 | -1.29 | 0.02 |
| hsa-miR-1291                    | -1.29 | 0.02 |
| hsa-miR-1301-3p                 | -1.29 | 0.02 |
| hsa-miR-130b-3p                 | -1.29 | 0.02 |
| hsa-miR-133b                    | -1.29 | 0.02 |
| hsa-miR-135a-5p                 | -1.29 | 0.02 |
| hsa-miR-142-5p                  | -1.29 | 0.02 |
| hsa-miR-1469                    | -1.29 | 0.02 |
| hsa-miR-151a-5p                 | -1.29 | 0.02 |
| hsa-miR-151b                    | -1.29 | 0.02 |
| hsa-miR-152-3p                  | -1.29 | 0.02 |
| hsa-miR-188-3p                  | -1.29 | 0.02 |
| hsa-miR-1910-3p                 | -1.29 | 0.02 |
| hsa-miR-193a-5p+hsa-miR-193b-5p | -1.29 | 0.02 |
| hsa-miR-193b-3p                 | -1.29 | 0.02 |
| hsa-miR-194-5p                  | -1.29 | 0.02 |
| hsa-miR-1973                    | -1.29 | 0.02 |
| hsa-miR-20a-5p+hsa-miR-20b-5p   | -1.29 | 0.02 |
| hsa-miR-211-3p                  | -1.29 | 0.02 |
| hsa-miR-2110                    | -1.29 | 0.02 |
| hsa-miR-221-5p                  | -1.29 | 0.02 |
| hsa-miR-3065-5p                 | -1.29 | 0.02 |
| hsa-miR-31-5p                   | -1.29 | 0.02 |
| hsa-miR-3140-3p                 | -1.29 | 0.02 |
| hsa-miR-3140-5p                 | -1.29 | 0.02 |
| hsa-miR-3192-5p                 | -1.29 | 0.02 |
| hsa-miR-3195                    | -1.29 | 0.02 |
| hsa-miR-320b                    | -1.29 | 0.02 |
| hsa-miR-326                     | -1.29 | 0.02 |
| hsa-miR-328-3p                  | -1.29 | 0.02 |
| hsa-miR-328-5p                  | -1.29 | 0.02 |
| hsa-miR-335-5p                  | -1.29 | 0.02 |
| hsa-miR-33a-5p                  | -1.29 | 0.02 |
| hsa-miR-362-3p                  | -1.29 | 0.02 |
| hsa-miR-365b-5p                 | -1.29 | 0.02 |
| hsa-miR-369-5p                  | -1.29 | 0.02 |
| hsa-miR-384                     | -1.29 | 0.02 |
| hsa-miR-409-3p                  | -1.29 | 0.02 |
| hsa-miR-409-5p                  | -1.29 | 0.02 |
| hsa-miR-412-3p                  | -1.29 | 0.02 |
| hsa-miR-425-5p                  | -1.29 | 0.02 |
| hsa-miR-4485-3p                 | -1.29 | 0.02 |
| hsa-miR-449a                    | -1.29 | 0.02 |

|                  |       |      |
|------------------|-------|------|
| hsa-miR-455-3p   | -1.29 | 0.02 |
| hsa-miR-4787-3p  | -1.29 | 0.02 |
| hsa-miR-485-5p   | -1.29 | 0.02 |
| hsa-miR-487b-3p  | -1.29 | 0.02 |
| hsa-miR-490-5p   | -1.29 | 0.02 |
| hsa-miR-491-5p   | -1.29 | 0.02 |
| hsa-miR-494-5p   | -1.29 | 0.02 |
| hsa-miR-501-3p   | -1.29 | 0.02 |
| hsa-miR-504-3p   | -1.29 | 0.02 |
| hsa-miR-505-3p   | -1.29 | 0.02 |
| hsa-miR-508-5p   | -1.29 | 0.02 |
| hsa-miR-518d-3p  | -1.29 | 0.02 |
| hsa-miR-518e-3p  | -1.29 | 0.02 |
| hsa-miR-525-3p   | -1.29 | 0.02 |
| hsa-miR-532-5p   | -1.29 | 0.02 |
| hsa-miR-548ad-3p | -1.29 | 0.02 |
| hsa-miR-550a-5p  | -1.29 | 0.02 |
| hsa-miR-574-3p   | -1.29 | 0.02 |
| hsa-miR-580-3p   | -1.29 | 0.02 |
| hsa-miR-590-3p   | -1.29 | 0.02 |
| hsa-miR-604      | -1.29 | 0.02 |
| hsa-miR-614      | -1.29 | 0.02 |
| hsa-miR-617      | -1.29 | 0.02 |
| hsa-miR-619-3p   | -1.29 | 0.02 |
| hsa-miR-639      | -1.29 | 0.02 |
| hsa-miR-641      | -1.29 | 0.02 |
| hsa-miR-6503-3p  | -1.29 | 0.02 |
| hsa-miR-664b-5p  | -1.29 | 0.02 |
| hsa-miR-708-5p   | -1.29 | 0.02 |
| hsa-miR-885-5p   | -1.29 | 0.02 |
| hsa-miR-887-3p   | -1.29 | 0.02 |
| hsa-miR-9-5p     | -1.29 | 0.02 |
| hsa-miR-934      | -1.29 | 0.02 |
| hsa-miR-937-3p   | -1.29 | 0.02 |
| hsa-miR-1260b    | -1.31 | 0.02 |
| hsa-miR-182-5p   | -1.31 | 0.02 |
| hsa-miR-376b-3p  | -1.31 | 0.02 |
| hsa-miR-4435     | -1.31 | 0.02 |
| hsa-miR-4792     | -1.31 | 0.04 |
