# Supplementary material for: Circulating microRNAs Suggest Networks Associated with Biological Functions in Aggressive Refractory Type 2 Celiac Disease
Source: MDPI journal article supplement (doi:10.3390/biomedicines10061408), 2022-06-14
Supplement: s1 [file s1]

**Table S3.** Main functional target genes common to several dysregulated miRNAs involved in biological processes and identified in serum from RCD2 patients.

| MiRNAs                                                                      | Gene          | Name                                                              | Annotation                             | Validations,<br>miRTarBase | Validations,<br>TarBase<br>(DIANA)                                                                         | Ref                |
|-----------------------------------------------------------------------------|---------------|-------------------------------------------------------------------|----------------------------------------|----------------------------|------------------------------------------------------------------------------------------------------------|--------------------|
| hsa-miR-101-3p<br>(down)<br>hsa-miR-107<br>(down)                           | <b>ACVR2B</b> | Activin A<br>Receptor<br>Type 2B                                  | GO:0071559                             | NGS                        | PAR-CLIP<br>HITS-CLIP<br>IP<br>RNase<br>treatment<br>Mild MNase<br>digestion<br>Treatment<br>with arsenite | [17,<br>18]        |
| hsa-let-7d-5p<br>(down)<br>hsa-miR-107<br>(down)                            | <b>AGO4</b>   | Argonaute<br>RISC<br>Component<br>4                               | GO:0040029<br>GO:0198738<br>GO:0010608 |                            |                                                                                                            |                    |
| hsa-miR-302c-3p<br>(up)<br>hsa-miR-101-3p<br>(down)                         | <b>ASAP1</b>  | ArfGAP With<br>SH3 Domain<br>Ankyrin<br>Repeat and<br>PH Domain 1 | GO:0043087                             |                            | Microarrays<br>PAR-CLIP                                                                                    | [17,<br>19,<br>20] |
| hsa-miR-302c-3p<br>(up)<br>hsa-miR-770-5p<br>(up)                           | <b>BTG1</b>   | BTG Anti-<br>Proliferation<br>Factor 1                            | GO:0001525                             | NGS<br>CLIP-seq            | PAR-CLIP IP<br>T1 RNase<br>treatment                                                                       | [19]               |
| hsa-miR-770-5p<br>(up)<br>hsa-let-7d-5p<br>(down)                           | <b>CCND2</b>  | Cyclin D2                                                         | GO:0044772<br>GO:0071900               |                            |                                                                                                            |                    |
| hsa-let-7d-5p<br>(down)<br>hsa-miR-181b-2-<br>3p (up)                       | <b>CEP135</b> | Centrosomal<br>protein 135                                        | GO:0044772                             | NGS<br>CLIP -seq           |                                                                                                            | [21]               |
| hsa-miR-935<br>(down)<br>hsa-let-7d-5p<br>(down)                            | <b>CPEB1</b>  | Cytoplasmic<br>Polyadenylation<br>Element<br>Binding<br>Protein 1 | GO:0001101<br>GO:0010608               |                            |                                                                                                            |                    |
| hsa-miR-101-3p<br>(down)<br>hsa-miR-770-5p<br>(up)<br>hsa-miR-107<br>(down) | <b>CPEB3</b>  | Cytoplasmic<br>Polyadenylation<br>Element<br>Binding<br>Protein 3 | GO:0001101<br>GO:0050769<br>GO:0010608 |                            | HITS-CLIP<br>PAR-CLIP<br>Mild MNase<br>digestion,<br>chimeric<br>fragments                                 | [17,<br>18,<br>22] |
| hsa-miR-101-3p<br>(down)<br>hsa-miR-302c-3p<br>(up)                         | <b>CREBRF</b> | CREB3<br>Regulatory<br>Factor                                     | GO:0048545                             | NGS<br>CLIP -seq           |                                                                                                            | [23]               |
| hsa-miR-935<br>(down)                                                       | <b>DMD</b>    | Dystrophin                                                        | GO:0032409                             |                            | PAR-CLIP<br>shRNAs                                                                                         | [24]               |

|                                                                     |              |                                         |                                                      |                                                          |                                                                                                        |                        |
|---------------------------------------------------------------------|--------------|-----------------------------------------|------------------------------------------------------|----------------------------------------------------------|--------------------------------------------------------------------------------------------------------|------------------------|
| hsa-let-7d-5p<br>(down)                                             |              |                                         |                                                      |                                                          | against HIV-1                                                                                          |                        |
| hsa-miR-101-3p<br>(down)<br>hsa-miR-181b-2-3p (up)                  | <b>DR1</b>   | Down-Regulator of Transcription 1       | GO:0016569                                           |                                                          | IPs<br>HITS-CLIP                                                                                       | [22, 25]               |
| hsa-miR-302c-3p (up)<br>hsa-miR-107 (down)                          | <b>ELK4</b>  | ETS Transcription Factor ELK4           | GO:0016569                                           | NGS<br>CLIP-seq                                          | PAR-CLIP<br>HITS-CLIP<br>IP<br>RNase treatment<br>Mild MNase digestion<br>Treatment with arsenite      | [17-19, 25-29]         |
| hsa-miR-320e (up)<br>hsa-miR-107 (down)                             | <b>EPHA7</b> | EPH Receptor A7                         | GO:0002009<br>GO:0061564<br>GO:0090066               |                                                          | PAR-CLIP IP<br>RNase treatment                                                                         | [18]                   |
| hsa-miR-935 (down)<br>hsa-miR-1226-3p (up)<br>hsa-miR-107 (down)    | <b>FBXW7</b> | F-box and WD Repeat domain containing 7 | GO:0001525                                           | Reporter assay<br>Western blot<br>microarray<br>CLIP-seq | PAR-CLIP<br>HITS-CLIP<br>IP<br>shRNAs against HIV-1<br>RNase treatment<br>Arsenite treatment           | [17, 18, 22-26, 28-30] |
| hsa-let-7d-5p (down)<br>hsa-miR-302c-3p (up)                        | <b>FZD3</b>  | Frizzled Class Receptor 3               | GO:0198738<br>GO:0002009<br>GO:0050769<br>GO:0061564 |                                                          | PAR-CLIP<br>shRNAs against HIV-1<br>Mild MNase digestion                                               | [18, 24, 29]           |
| hsa-miR-935 (down)<br>hsa-miR-101-3p (down)<br>hsa-miR-302c-3p (up) | <b>FZD6</b>  | Frizzled Class Receptor 6               | GO:0198738<br>GO:0002009                             | NGS, CLIP-seq                                            | Chimeric fragments, MICROARRAYS<br>HITS-CLIP<br>PAR-CLIP<br>Mild MNase digestion<br>T1 RNase treatment | [17 – 19, 28, 31–33]   |
| hsa-miR-490-3p (up)<br>hsa-miR-107 (down)                           | <b>KDM7A</b> | Lysine Demethylase 7A                   | GO:0016569                                           |                                                          |                                                                                                        |                        |
| hsa-miR-101-3p (down)                                               | <b>LRP2</b>  | LDL receptor related                    | GO:0002009<br>GO:0050769                             |                                                          |                                                                                                        |                        |

|                                                                              |                |                                                  |                                                      |                                                   |                                                   |                           |
|------------------------------------------------------------------------------|----------------|--------------------------------------------------|------------------------------------------------------|---------------------------------------------------|---------------------------------------------------|---------------------------|
| hsa-miR-302c-3p<br>(up)                                                      |                | protein 2                                        |                                                      |                                                   |                                                   |                           |
| hsa-miR-371a-5p<br>(up)<br>hsa-miR-770-5p<br>(up)                            | <b>MAP3K1</b>  | Mitogen-Activated Protein Kinase Kinase Kinase 1 | GO:0071900                                           |                                                   |                                                   |                           |
| hsa-let-7d-5p<br>(down)<br>hsa-miR-1306-5p<br>(down)                         | <b>MAPK6</b>   | Mitogen-Activated Protein Kinase 6               | GO:0050769                                           | NGS<br>CLIP-seq                                   | PAR-CLIP<br>HITS-CLIP<br>IP<br>RNase<br>treatment | [18,<br>25,<br>34]        |
| hsa-miR-101-3p<br>(down)<br>hsa-miR-770-5p<br>(up)                           | <b>MARK1</b>   | Microtubule Affinity Regulating Kinase 1         | GO:0198738                                           |                                                   | HITS-CLIP                                         | [22]                      |
| hsa-miR-101-3p<br>(down)<br>hsa-miR-302c-3p<br>(up)<br>hsa-miR-107<br>(down) | <b>MYCN</b>    | MYCN proto-oncogene bHLH transcription factor    | GO:0040029<br>GO:0010608                             | Reporter assay,<br>Western blot,<br>NGS, CLIP-seq | Luciferase reporter assay,<br>chimeric fragments  | [31,<br>35,<br>36]        |
| hsa-miR-181b-2-3p (up)<br>hsa-miR-770-5p<br>(up)                             | <b>MYH10</b>   | Myosin Heavy Chain 10                            | GO:0001701<br>GO:0061564                             |                                                   |                                                   |                           |
| hsa-miR-935<br>(down)<br>hsa-let-7d-5p<br>(down)                             | <b>ONECUT2</b> | One Cut Homeobox 2                               | GO:0071559                                           | NGS, CLIP-seq                                     |                                                   | [23,<br>29]               |
| hsa-let-7d-5p<br>(down)<br>hsa-miR-770-5p<br>(up)                            | <b>PBX1</b>    | PBX homeobox 1                                   | GO:0044772<br>GO:0002009                             |                                                   | PAR-CLIP<br>shRNAs<br>against HIV-1<br>HITS-CLIP  | [24,<br>30]               |
| hsa-miR-302c-3p<br>(up)<br>hsa-miR-107<br>(down)                             | <b>PPP6C</b>   | Protein Phosphatase 6 Catalytic subunit          | GO:0044772<br>GO:0016311                             | NGS, CLIP-seq                                     | PAR-CLIP<br>HITS-CLIP<br>Mild MNase digestion     | [17,<br>18,<br>26,<br>29] |
| hsa-miR-302c-3p<br>(up)<br>hsa-miR-1306-5p<br>(down)                         | <b>RELA</b>    | RELA proto-oncogen NF-kB subunit                 | GO:0001101<br>GO:0050769<br>GO:0048545<br>GO:1902532 |                                                   |                                                   |                           |
| hsa-miR-935<br>(down)<br>hsa-miR-101-3p<br>(down)                            | <b>RORA</b>    | RAR Related Orphan Receptor A                    | GO:0001525<br>GO:0048545<br>GO:1902532               | NGS<br>CLIP-seq                                   | Microarray<br>PAR-CLIP IP<br>RNase<br>treatment   | [17-<br>20,<br>26]        |
| hsa-miR-101-3p<br>(down)<br>hsa-miR-107<br>(down)                            | <b>SIX4</b>    | SIX Homeobox 4                                   | GO:0002009                                           | NGS, CLIP-seq                                     | PAR-CLIP<br>Mild MNase digestion                  | [18,<br>29]               |

|                                                                                 |                |                                                                                                                          |                                                      |                   |                                                                      |                    |
|---------------------------------------------------------------------------------|----------------|--------------------------------------------------------------------------------------------------------------------------|------------------------------------------------------|-------------------|----------------------------------------------------------------------|--------------------|
| hsa-miR-101-3p<br>(down)<br>hsa-miR-606<br>(down)                               | <b>SMARCA5</b> | SWI/SNF<br>Related<br>Matrix<br>Associated<br>Actin<br>Dependent<br>Regulator of<br>Chromatin<br>Subfamily A<br>Member 5 | GO:0040029                                           |                   | Microarrays<br>HITS-CLIP                                             | [20,<br>34]        |
| hsa-miR-101-3p<br>(down)<br>hsa-miR-606<br>(down)                               | <b>STC1</b>    | Stanniocalcin<br>1                                                                                                       | GO:0048545                                           | CLIP-seq          | Microarrays                                                          | [32]               |
| hsa-miR-320e<br>(up)<br>hsa-miR-107<br>(down)                                   | <b>TDG</b>     | Thymine<br>DNA<br>Glycosylase                                                                                            | GO:0040029                                           |                   |                                                                      |                    |
| hsa-miR-101-3p<br>(down)<br>hsa-miR-302c-3p<br>(up)                             | <b>TET2</b>    | Tet<br>Methylcytosi<br>ne<br>Dioxygenase<br>2                                                                            | GO:0016569                                           |                   | Luciferase<br>reporter<br>assay<br>PAR-CLIP<br>T1 RNase<br>treatment | [19,<br>26,<br>37] |
| hsa-let-7d-5p<br>(down)<br>hsa-miR-302c-3p<br>(up)<br>hsa-miR-1306-5p<br>(down) | <b>TET3</b>    | Tet<br>Methylcytosi<br>ne<br>Dioxygenase<br>3                                                                            | GO:0016569                                           |                   | PAR-CLIP<br>shRNAs<br>against HIV-<br>1<br>HITS-CLIP                 | [24,<br>27,<br>30] |
| hsa-let-7d-5p<br>(down)<br>hsa-miR-101-3p<br>(down)<br>hsa-miR-107<br>(down)    | <b>TGFBR3</b>  | Transforming<br>Growth<br>Factor $\beta$<br>Receptor 3                                                                   | GO:0071559<br>GO:0001101                             | NGS, CLIP-<br>seq | PAR-CLIP<br>Mild MNase<br>digestion<br>HITS-CLIP                     | [18,<br>33,<br>34] |
| hsa-miR-101-3p<br>(down)<br>hsa-miR-181b-2-<br>3p (up)<br>hsa-miR-107<br>(down) | <b>TNRC6B</b>  | Trinucleotide<br>Repeat<br>Containing<br>Adaptor 6B                                                                      | GO:0040029<br>GO:0198738<br>GO:0010608               |                   | HITS-CLIP<br>Microarrays                                             | [20,<br>22,<br>33] |
| hsa-let-7d-5p<br>(down)<br>hsa-miR-107<br>(down)                                | <b>TRIM71</b>  | Tripartite<br>Motif<br>Containing 71                                                                                     | GO:0040029<br>GO:0044772<br>GO:0002009<br>GO:0010608 | NGS<br>CLIP-seq   | PAR-CLIP<br>Mild MNase<br>digestion                                  | [18,<br>29]        |
| hsa-miR-101-3p<br>(down)<br>hsa-miR-770-5p<br>(up)                              | <b>UBR3</b>    | Ubiquitin<br>Protein<br>Ligase E3<br>Component<br>N-Recognin 3                                                           | GO:0001701                                           |                   | HITS-CLIP                                                            | [22]               |
| hsa-miR-101-3p                                                                  | <b>VLDLR</b>   | Very Low                                                                                                                 | GO:0050769                                           |                   |                                                                      |                    |

|                                   |  |                                    |            |  |  |  |
|-----------------------------------|--|------------------------------------|------------|--|--|--|
| (down)<br>hsa-miR-302c-3p<br>(up) |  | Density<br>Lipoprotein<br>Receptor | GO:0061564 |  |  |  |
|-----------------------------------|--|------------------------------------|------------|--|--|--|
