# Supplementary material for: Circulating microRNAs Suggest Networks Associated with Biological Functions in Aggressive Refractory Type 2 Celiac Disease
Source: MDPI journal article supplement (doi:10.3390/biomedicines10061408), 2022-06-14
Supplement: s1 [file s1]

**Table S1.** Patient description.

| Cohort of CD patients | Sex | Age (Y) | Age at CD diagnosis (Y) | Age at RCD diagnosis (Y) | Duodenal histology | TG2 antibodies | Aberrant IEL (%) | Comorbidities                                            | TCR $\gamma$ | Therapy    | GIP results |
|-----------------------|-----|---------|-------------------------|--------------------------|--------------------|----------------|------------------|----------------------------------------------------------|--------------|------------|-------------|
| GFD-responsive        | F   | 43      | 5                       | na                       | 0                  | negative       | na               | hypothyroidism                                           | na           | na         | negative    |
| GFD-responsive        | F   | 39      | 4                       | na                       | 0                  | negative       | na               | none                                                     | na           | na         | negative    |
| GFD-responsive        | F   | 29      | 3                       | na                       | 0                  | negative       | na               | hypothyroidism, diabetes type 1                          | na           | na         | negative    |
| GFD-responsive        | M   | 58      | 3                       | na                       | 0                  | negative       | na               | none                                                     | na           | na         | negative    |
| GFD-responsive        | F   | 43      | 31                      | na                       | 0                  | negative       | na               | none                                                     | na           | na         | negative    |
| RCD1                  | F   | 34      | 26                      | 27                       | 3b                 | negative       | <20%             | none                                                     | policlonal   | azatioprin | negative    |
| RCD1                  | M   | 55      | 51                      | 52                       | 3c                 | positive       | <20%             | none                                                     | policlonal   | budesonide | negative    |
| RCD1                  | M   | 45      | 32                      | 35                       | 3b                 | negative       | <20%             | none                                                     | policlonal   | azatioprin | negative    |
| RCD1                  | F   | 64      | 53                      | 58                       | 3b                 | positive       | <20%             | autoimmune hepatitis                                     | policlonal   | budesonide | negative    |
| RCD1                  | F   | 47      | 43                      | 44                       | 3a                 | negative       | <20%             | none                                                     | policlonal   | budesonide | negative    |
| RCD1                  | F   | 43      | 32                      | 40                       | 3b                 | positive       | <20%             | thyroiditis                                              | policlonal   | budesonide | negative    |
| RCD2                  | M   | 79      | 64                      | 64                       | 3c                 | negative       | >20%             | autoimmune hepatitis, psoriasis, thyroiditis             | monoclonal   | cladibrin  | negative    |
| RCD2                  | F   | 38      | 32                      | 33                       | 3c                 | negative       | >20%             | autoimmune hepatitis, thyroiditis, psoriasis, vasculitis | monoclonal   | cladibrin  | negative    |
| RCD2                  | M   | 56      | 51                      | 52                       | 3c                 | negative       | >20%             | none                                                     | monoclonal   | cladibrin  | negative    |
| RCD2                  | F   | 68      | 62                      | 63                       | 3c                 | negative       | >20%             | none                                                     | monoclonal   | cladibrin  | negative    |
| RCD2                  | F   | 73      | 66                      | 66                       | 3c                 | positive       | >20%             | thyroiditis, autoimmune hepatitis                        | monoclonal   | cladibrin  | negative    |
